# Supplementary material for: The efficacy of DNA mismatch repair enzyme immunohistochemistry as a screening test for hypermutated gliomas
Source: PubMed Central journal article supplement (PMC7017562; doi:10.1186/s40478-020-0892-2), 2020-02-12
Supplement: 40478_2020_892_MOESM1_ESM.pdf [file 40478_2020_892_MOESM1_ESM.pdf]

Supplementary Data for

**The efficacy of DNA mismatch repair enzyme immunohistochemistry as a screening test  
for hypermutated gliomas**

Matthew McCord, MD,<sup>1</sup> Alicia Steffens,<sup>2</sup> Rodrigo Javier,<sup>2</sup> Kwok-Ling Kam, MBBS,<sup>1</sup> Kathleen  
McCortney, MS,<sup>2</sup> and Craig Horbinski, MD PhD<sup>1, 2</sup>

<sup>1</sup>Department of Pathology, Northwestern University, Chicago, IL 60630, USA

<sup>2</sup>Department of Neurosurgery, Northwestern University, Chicago, IL 60630, USA

| Tumor # | Sex | Age | Location           | Diagnosis | Histotype        | WHO grade | IDH1      | MGMT         | Primary vs recurrent | Pre vs post-TMZ | TMZ dose        | TMZ cycles pre-recurrence | CCNU pre-recurrence? | Bev pre-recurrence? | Radiation pre-recurrence? | Hypermutated? |
|---------|-----|-----|--------------------|-----------|------------------|-----------|-----------|--------------|----------------------|-----------------|-----------------|---------------------------|----------------------|---------------------|---------------------------|---------------|
| 1       | F   | 56  | R Parietal         | GBM       | Astrocytic       | IV        | Wild type | Methylated   | Recurrent            | Post            | 200 mg/m2       | 14                        | N                    | N                   | Y                         | Y             |
| 2       | F   | 56  | R Temporal         | GBM       | Astrocytic       | IV        | Wild type | Methylated   | Recurrent            | Post            | 200mg/m2        | 12                        | N                    | N                   | Y                         | Y             |
| 3       | M   | 53  | L Frontal          | GBM       | Astrocytic       | IV        | Mutant    | Methylated   | Recurrent            | Post            | Incomplete data | Incomplete data           | N                    | N                   | Y                         | Y             |
| 4       | M   | 63  | R Parietal         | GBM       | Astrocytic       | IV        | Mutant    | Methylated   | Recurrent            | Post            | Incomplete data | 10                        | N                    | Y                   | Y                         | Y             |
| 5       | M   | 42  | L Temporal         | GBM       | Astrocytic       | IV        | Mutant    | Unmethylated | Recurrent            | Post            | Incomplete data | Incomplete data           | N                    | N                   | Y                         | Y             |
| 6       | F   | 65  | L Occipital        | GBM       | Astrocytic       | IV        | Wild type | Methylated   | Recurrent            | Post            | 200 mg/m2       | 18                        | Y                    | N                   | Y                         | Y             |
| 7       | F   | 43  | L Frontal          | GBM       | Astrocytic       | IV        | Mutant    | Methylated   | Recurrent            | Post            | 150 mg/m2       | Non-cyclic                | N                    | N                   | N                         | Y             |
| 8       | M   | 32  | R Frontal          | GBM       | Astrocytic       | IV        | Mutant    | Methylated   | Recurrent            | Post            | 200 mg/m2       | 6                         | N                    | N                   | Y                         | Y             |
| 9       | M   | 58  | R Frontal          | GBM       | Astrocytic       | IV        | Wild type | Methylated   | Recurrent            | Post            | Incomplete data | Incomplete data           | N                    | Y                   | Y                         | Y             |
| 10      | F   | 68  | L Occipital        | GBM       | Astrocytic       | IV        | Wild type | Methylated   | Recurrent            | Post            | 75 mg/m2        | Non-cyclic                | N                    | N                   | Y                         | N             |
| 11      | M   | 39  | L Temporal         | GBM       | Astrocytic       | IV        | Mutant    | Unmethylated | Recurrent            | Post            | Incomplete data | Incomplete data           | N                    | N                   | Y                         | N             |
| 12      | M   | 34  | L Temporal         | A Astro   | Astrocytic       | III       | Mutant    | Unmethylated | Primary              | Pre             | N/A             | N/A                       | N/A                  | N/A                 | N/A                       | N             |
| 13      | M   | 40  | L Fronto-temporal  | A Oligo   | Oligodendroglial | III       | Mutant    | Methylated   | Recurrent            | Pre             | N/A             | N/A                       | N                    | N                   | Y                         | N             |
| 14      | M   | 40  | L Parietal         | GBM       | Astrocytic       | IV        | Mutant    | Methylated   | Recurrent            | Post            | 200 mg/m2       | 6                         | N                    | N                   | Y                         | N             |
| 15      | M   | 19  | L Frontal          | Oligo     | Oligodendroglial | II        | Mutant    | Unmethylated | Primary              | Pre             | N/A             | N/A                       | N/A                  | N/A                 | N/A                       | N             |
| 16      | F   | 24  | R Frontal          | D Astro   | Astrocytic       | II        | Mutant    | Methylated   | Primary              | Pre             | N/A             | N/A                       | N/A                  | N/A                 | N/A                       | N             |
| 17      | F   | 69  | R Parietal         | GBM       | Astrocytic       | IV        | Wild type | Unmethylated | Primary              | Pre             | N/A             | N/A                       | N/A                  | N/A                 | N/A                       | N             |
| 18      | F   | 73  | R Parietal         | GBM       | Astrocytic       | IV        | Wild type | Methylated   | Primary              | Pre             | N/A             | N/A                       | N/A                  | N/A                 | N/A                       | N             |
| 19      | F   | 65  | L Frontal          | GBM       | Astrocytic       | IV        | Wild type | Unmethylated | Recurrent            | Post            | Incomplete data | 6                         | N                    | Y                   | Y                         | N             |
| 20      | F   | 48  | R Parieto-temporal | GBM       | Astrocytic       | IV        | Wild type | Unmethylated | Primary              | Pre             | N/A             | N/A                       | N/A                  | N/A                 | N/A                       | N             |
| 21      | M   | 45  | L Temporal         | GBM       | Astrocytic       | IV        | Wild type | Unmethylated | Recurrent            | Post            | 150 mg/m2       | 7                         | N                    | N                   | Y                         | N             |
| 22      | M   | 47  | L Temporal         | GBM       | Astrocytic       | IV        | Wild type | Methylated   | Recurrent            | Post            | 200 mg/m2       | 12                        | N                    | N                   | Y                         | N             |
| 23      | F   | 73  | R Frontal          | GBM       | Astrocytic       | IV        | Wild type | Unmethylated | Primary              | Pre             | N/A             | N/A                       | N/A                  | N/A                 | N/A                       | N             |
| 24      | M   | 32  | L Frontal          | A Astro   | Astrocytic       | III       | Mutant    | Methylated   | Primary              | Pre             | N/A             | N/A                       | N/A                  | N/A                 | N/A                       | N             |
| 25      | F   | 49  | R Frontal          | GBM       | Astrocytic       | IV        | Mutant    | Unmethylated | Primary              | Pre             | N/A             | N/A                       | N/A                  | N/A                 | N/A                       | N             |
| 26      | M   | 48  | R Frontal          | A Oligo   | Oligodendroglial | III       | Mutant    | Methylated   | Primary              | Pre             | N/A             | N/A                       | N/A                  | N/A                 | N/A                       | N             |
| 27      | M   | 76  | R Parietal         | GBM       | Astrocytic       | IV        | Wild type | Unmethylated | Primary              | Pre             | N/A             | N/A                       | N/A                  | N/A                 | N/A                       | N             |
| 28      | M   | 24  | L Temporal         | A Astro   | Astrocytic       | III       | Wild type | Methylated   | Primary              | Pre             | N/A             | N/A                       | N/A                  | N/A                 | N/A                       | N             |
| 29      | F   | 67  | L Temporal         | GBM       | Astrocytic       | IV        | Wild type | Unmethylated | Primary              | Pre             | N/A             | N/A                       | N/A                  | N/A                 | N/A                       | N             |
| 30      | M   | 69  | L Frontal          | GBM       | Astrocytic       | IV        | Wild type | Methylated   | Primary              | Pre             | N/A             | N/A                       | N/A                  | N/A                 | N/A                       | N             |
| 31      | F   | 28  | L insular          | D Astro   | Astrocytic       | II        | Mutant    | Unmethylated | Primary              | Pre             | N/A             | N/A                       | N/A                  | N/A                 | N/A                       | N             |
| 32      | M   | 26  | L Frontal          | A Astro   | Astrocytic       | III       | Mutant    | Unmethylated | Primary              | Pre             | N/A             | N/A                       | N/A                  | N/A                 | N/A                       | N             |

|    |   |    |                   |               |                  |     |           |              |           |      |                 |                   |     |     |     |   |
|----|---|----|-------------------|---------------|------------------|-----|-----------|--------------|-----------|------|-----------------|-------------------|-----|-----|-----|---|
| 33 | F | 74 | L Temporal        | GBM           | Astrocytic       | IV  | Wild type | Methylated   | Primary   | Pre  | N/A             | N/A               | N/A | N/A | N/A | N |
| 34 | F | 25 | L Temporal        | GBM           | Astrocytic       | IV  | Wild type | Unmethylated | Recurrent | Pre  | N/A             | N/A               | N   | N   | N   | N |
| 35 | F | 21 | R Frontal         | A Astro       | Astrocytic       | III | Mutant    | Methylated   | Primary   | Pre  | N/A             | N/A               | N/A | N/A | N/A | N |
| 36 | M | 50 | L Frontal         | GBM           | Astrocytic       | IV  | Wild type | Unmethylated | Primary   | Pre  | N/A             | N/A               | N/A | N/A | N/A | N |
| 37 | M | 68 | R Temporal        | GBM           | Astrocytic       | IV  | Mutant    | Methylated   | Recurrent | Post | Incomplete data | 2                 | N   | N   | Y   | N |
| 38 | M | 85 | R Temporal        | GBM           | Astrocytic       | IV  | Wild type | Unmethylated | Recurrent | Post | Incomplete data | 3                 | N   | N   | Y   | N |
| 39 | F | 53 | R Frontal         | GBM           | Astrocytic       | IV  | Wild type | Unmethylated | Primary   | Pre  | N/A             | N/A               | N/A | N/A | N/A | N |
| 40 | M | 43 | R Temporal        | GBM           | Astrocytic       | IV  | Mutant    | Unmethylated | Recurrent | Pre  | N/A             | N/A               | Y   | N   | Y   | N |
| 41 | M | 48 | R Temporal        | D Astro       | Astrocytic       | II  | Wild type | Unmethylated | Primary   | Pre  | N/A             | N/A               | N/A | N/A | N/A | N |
| 42 | F | 74 | L Temporal        | GBM           | Astrocytic       | IV  | Wild type | Unmethylated | Primary   | Pre  | N/A             | N/A               | N/A | N/A | N/A | N |
| 43 | M | 63 | R Frontal         | GBM           | Astrocytic       | IV  | Wild type | Unmethylated | Recurrent | Post | Incomplete data | 5 (8 week cycles) | Y   | Y   | Y   | N |
| 44 | M | 28 | R Temporal        | A Astro       | Astrocytic       | III | Mutant    | Methylated   | Primary   | Pre  | N/A             | N/A               | N/A | N/A | N/A | N |
| 45 | M | 44 | R Fronto-temporal | GBM           | Astrocytic       | IV  | Mutant    | Methylated   | Recurrent | Post | 150 mg/m2       | 6                 | N   | N   | Y   | N |
| 46 | M | 48 | R Temporal        | GBM           | Astrocytic       | IV  | Wild type | Unmethylated | Primary   | Pre  | N/A             | N/A               | N/A | N/A | N/A | N |
| 47 | F | 26 | L Frontal         | GBM           | Astrocytic       | IV  | Wild type | Unmethylated | Primary   | Pre  | N/A             | N/A               | N/A | N/A | N/A | N |
| 48 | F | 68 | R Temporal        | GBM           | Astrocytic       | IV  | Wild type | Unmethylated | Primary   | Pre  | N/A             | N/A               | N/A | N/A | N/A | N |
| 49 | F | 82 | R Temporal        | GBM           | Astrocytic       | IV  | Wild type | Unmethylated | Primary   | Pre  | N/A             | N/A               | N/A | N/A | N/A | N |
| 50 | F | 31 | L Parietal        | PXA           | Astrocytic       | II  | Wild type | Unmethylated | Primary   | Pre  | N/A             | N/A               | N/A | N/A | N/A | N |
| 51 | F | 48 | Corpus callosum   | GBM           | Astrocytic       | IV  | Wild type | Methylated   | Recurrent | Post | 200 mg/m2       | 14                | N   | N   | Y   | N |
| 52 | F | 48 | L Frontal         | GBM           | Astrocytic       | IV  | Wild type | Methylated   | Recurrent | Post | 150 mg/m2       | 3                 | N   | N   | Y   | N |
| 53 | M | 68 | R Frontal         | GBM           | Astrocytic       | IV  | Wild type | Methylated   | Primary   | Pre  | N/A             | N/A               | N/A | N/A | N/A | N |
| 54 | F | 32 | R Frontal         | A Astro       | Astrocytic       | III | Mutant    | Methylated   | Recurrent | Post | 150 mg/m2       | 6                 | N   | N   | Y   | N |
| 55 | F | 36 | R Parietal        | A Astro       | Astrocytic       | III | Mutant    | Methylated   | Primary   | Pre  | N/A             | N/A               | N/A | N/A | N/A | N |
| 56 | F | 56 | L Frontal         | A Astro       | Astrocytic       | III | Mutant    | Methylated   | Primary   | Pre  | N/A             | N/A               | N/A | N/A | N/A | N |
| 57 | F | 21 | R Frontal         | Oligo         | Oligodendroglial | II  | Mutant    | Methylated   | Primary   | Pre  | N/A             | N/A               | N/A | N/A | N/A | N |
| 58 | M | 33 | 3rd Ventricle     | Ganglioglioma | Glioneuronal     | I   | Wild type | N/A          | Primary   | Pre  | N/A             | N/A               | N/A | N/A | N/A | N |
| 59 | F | 47 | L Temporal        | A Astro       | Astrocytic       | III | Wild type | Methylated   | Primary   | Pre  | N/A             | N/A               | N/A | N/A | N/A | N |
| 60 | F | 29 | R Parietal        | A Astro       | Astrocytic       | III | Mutant    | Unmethylated | Primary   | Pre  | N/A             | N/A               | N/A | N/A | N/A | N |
| 61 | F | 48 | R Temporal        | GBM           | Astrocytic       | IV  | Wild type | Unmethylated | Primary   | Pre  | N/A             | N/A               | N/A | N/A | N/A | N |
| 62 | F | 76 | R Fronto-parietal | GBM           | Astrocytic       | IV  | Wild type | Unmethylated | Primary   | Pre  | N/A             | N/A               | N/A | N/A | N/A | N |
| 63 | M | 74 | R Temporal        | GBM           | Astrocytic       | IV  | Wild type | Unmethylated | Primary   | Pre  | N/A             | N/A               | N/A | N/A | N/A | N |
| 64 | F | 48 | L Frontal         | GBM           | Astrocytic       | IV  | Mutant    | Methylated   | Primary   | Pre  | N/A             | N/A               | N/A | N/A | N/A | N |
| 65 | F | 37 | R Frontal         | Oligo         | Oligodendroglial | II  | Mutant    | Methylated   | Primary   | Pre  | N/A             | N/A               | N/A | N/A | N/A | N |
| 66 | F | 35 | L Temporal        | GBM           | Astrocytic       | IV  | Wild type | Methylated   | Recurrent | Post | 150 mg/m2       | 12                | N   | N   | Y   | N |

|     |   |    |                 |                 |                  |     |           |              |           |      |                 |                 |     |     |     |   |
|-----|---|----|-----------------|-----------------|------------------|-----|-----------|--------------|-----------|------|-----------------|-----------------|-----|-----|-----|---|
| 67  | M | 62 | R Temporal      | GBM             | Astrocytic       | IV  | Wild type | Unmethylated | Primary   | Pre  | N/A             | N/A             | N/A | N/A | N/A | N |
| 68  | M | 62 | Corpus callosum | GBM             | Astrocytic       | IV  | Wild type | Unmethylated | Primary   | Pre  | N/A             | N/A             | N/A | N/A | N/A | N |
| 69  | F | 35 | R Temporal      | GBM             | Astrocytic       | IV  | Wild type | Unmethylated | Recurrent | Post | 150 mg/m2       | 9               | N   | N   | Y   | N |
| 70  | M | 71 | R Frontal       | GBM             | Astrocytic       | IV  | Wild type | N/A          | Recurrent | Post | Incomplete data | 3               | Y   | Y   | Y   | N |
| 71  | F | 48 | R Frontal       | GBM             | Astrocytic       | IV  | Wild type | Unmethylated | Primary   | Pre  | N/A             | N/A             | N/A | N/A | N/A | N |
| 72  | F | 41 | L Frontal       | GBM             | Astrocytic       | IV  | Wild type | Methylated   | Recurrent | Post | 200 mg/m2       | 4               | N   | N   | Y   | N |
| 73  | M | 56 | R Frontal       | GBM             | Astrocytic       | IV  | Wild type | Methylated   | Primary   | Pre  | N/A             | N/A             | N/A | N/A | N/A | N |
| 74  | M | 74 | L Occipital     | GBM             | Astrocytic       | IV  | Wild type | Unmethylated | Primary   | Pre  | N/A             | N/A             | N/A | N/A | N/A | N |
| 75  | M | 22 | L Frontal       | Oligo           | Oligodendroglial | II  | Mutant    | Methylated   | Primary   | Pre  | N/A             | N/A             | N/A | N/A | N/A | N |
| 76  | F | 55 | L Frontal       | GBM             | Astrocytic       | IV  | Wild type | Unmethylated | Recurrent | Post | 200 mg/m2       | 6               | Y   | N   | Y   | N |
| 77  | F | 41 | L Frontal       | Oligo           | Oligodendroglial | II  | Mutant    | Methylated   | Primary   | Pre  | N/A             | N/A             | N/A | N/A | N/A | N |
| 78  | M | 31 | Brainstem       | Ganglioglioma   | Glioneuronal     | I   | Wild type | N/A          | Recurrent | Pre  | N/A             | N/A             | N   | N   | N   | N |
| 79  | F | 25 | L Temporal      | Pilocytic Astro | Astrocytic       | I   | Wild type | N/A          | Primary   | Pre  | N/A             | N/A             | N/A | N/A | N/A | N |
| 80  | F | 30 | L Frontal       | Oligo           | Oligodendroglial | II  | Mutant    | Methylated   | Recurrent | Pre  | N/A             | N/A             | N   | N   | N   | N |
| 81  | F | 31 | L Temporal      | GBM             | Astrocytic       | IV  | Wild type | Unmethylated | Primary   | Pre  | N/A             | N/A             | N/A | N/A | N/A | N |
| 82  | F | 74 | L Occipital     | GBM             | Astrocytic       | IV  | Wild type | Unmethylated | Primary   | Pre  | N/A             | N/A             | N/A | N/A | N/A | N |
| 83  | M | 50 | R Frontal       | GBM             | Astrocytic       | IV  | Wild type | N/A          | Primary   | Pre  | N/A             | N/A             | N/A | N/A | N/A | N |
| 84  | M | 63 | L Frontal       | GBM             | Astrocytic       | IV  | Wild type | Unmethylated | Recurrent | Post | Incomplete data | 2               | N   | N   | Y   | N |
| 85  | M | 56 | L Temporal      | GBM             | Astrocytic       | IV  | Wild type | Methylated   | Primary   | Pre  | N/A             | N/A             | N/A | N/A | N/A | N |
| 86  | M | 68 | L Temporal      | GBM             | Astrocytic       | IV  | Wild type | Methylated   | Recurrent | Post | 200 mg/m2       | 21              | N   | N   | Y   | N |
| 87  | M | 63 | L Frontal       | GBM             | Astrocytic       | IV  | Wild type | Unmethylated | Primary   | Pre  | N/A             | N/A             | N/A | N/A | N/A | N |
| 88  | F | 26 | L Frontal       | A Astro         | Astrocytic       | III | Mutant    | Methylated   | Primary   | Pre  | N/A             | N/A             | N/A | N/A | N/A | N |
| 89  | F | 58 | R Frontal       | GBM             | Astrocytic       | IV  | Wild type | Unmethylated | Primary   | Pre  | N/A             | N/A             | N/A | N/A | N/A | N |
| 90  | M | 45 | L Temporal      | GBM             | Astrocytic       | IV  | Wild type | Unmethylated | Primary   | Pre  | N/A             | N/A             | N/A | N/A | N/A | N |
| 91  | F | 76 | L Temporal      | GBM             | Astrocytic       | IV  | Wild type | Unmethylated | Recurrent | Post | 200 mg/m2       | 6               | N   | N   | N   | N |
| 92  | F | 53 | L Frontal       | Oligo           | Oligodendroglial | II  | Mutant    | Methylated   | Recurrent | Post | 75 mg/m2        | 5               | Y   | N   | N   | N |
| 93  | F | 56 | R Temporal      | GBM             | Astrocytic       | IV  | Wild type | Unmethylated | Primary   | Pre  | N/A             | N/A             | N/A | N/A | N/A | N |
| 94  | F | 42 | L Parietal      | A Astro         | Astrocytic       | III | Mutant    | Methylated   | Recurrent | Post | Incomplete data | Incomplete data | N   | N   | Y   | N |
| 95  | F | 59 | L Temporal      | GBM             | Astrocytic       | IV  | Wild type | Unmethylated | Primary   | Pre  | N/A             | N/A             | N/A | N/A | N/A | N |
| 96  | F | 53 | L Parietal      | GBM             | Astrocytic       | IV  | Wild type | Unmethylated | Primary   | Pre  | N/A             | N/A             | N/A | N/A | N/A | N |
| 97  | M | 41 | R Temporal      | GBM             | Astrocytic       | IV  | Wild type | Unmethylated | Primary   | Pre  | N/A             | N/A             | N/A | N/A | N/A | N |
| 98  | M | 54 | L Frontal       | GBM             | Astrocytic       | IV  | Wild type | Methylated   | Recurrent | Post | 200 mg/m2       | 3               | N   | N   | Y   | N |
| 99  | F | 30 | L Temporal      | Ganglioglioma   | Glioneuronal     | I   | Wild type | N/A          | Primary   | Pre  | N/A             | N/A             | N/A | N/A | N/A | N |
| 100 | M | 66 | L Frontal       | GBM             | Astrocytic       | IV  | Wild type | Unmethylated | Primary   | Pre  | N/A             | N/A             | N/A | N/A | N/A | N |

**Supplementary Table 1:** Detailed clinical and pathologic data for the full cohort of 100 gliomas. Tumors 1-9 are hypermutated and are also shown in **Table 1** of the main manuscript. The following tumors are from the same patients: 1 and 2; 5, 11, and 12; 7 and 94. Pre-TMZ gliomas were designated as N/A in the TMZ dose and duration columns. Records on temozolomide dosage and cycles were incomplete for many post-TMZ patients, because they had been treated at outside institutions prior to re-resection at Northwestern. “D Astro”=diffuse astrocytoma; “A Astro”=anaplastic astrocytoma; “A Oligo”=anaplastic oligodendroglioma; N/A=not available or not applicable.

|                 | hypermutant | age     | male   | astrocytic | WHO grade | IDH1 mutant | MGMT methylated | recurrent | post-TMZ |
|-----------------|-------------|---------|--------|------------|-----------|-------------|-----------------|-----------|----------|
| hypermutant     | 1           |         |        |            |           |             |                 |           |          |
| age             | 0.03        | 1       |        |            |           |             |                 |           |          |
| male            | 0.11        | 0.037   | 1      |            |           |             |                 |           |          |
| astrocytic      | 0.10        | 0.31    | 0.0047 | 1          |           |             |                 |           |          |
| WHO grade       | 0.19        | 0.61*   | 0.099  | 0.59*      | 1         |             |                 |           |          |
| IDH1 mutant     | 0.17        | -0.56*  | 0.074  | -0.43*     | -0.61*    | 1           |                 |           |          |
| MGMT methylated | 0.25*       | -0.22*  | 0.0056 | -0.27*     | -0.30*    | 0.40*       | 1               |           |          |
| recurrent       | 0.39*       | -0.0083 | 0.098  | 0.029      | 0.24*     | 0.10        | 0.29*           | 1         |          |
| post-TMZ        | 0.43*       | 0.082   | 0.092  | 0.15       | 0.29*     | 0.032       | 0.29*           | 0.91*     | 1        |

**Supplementary Table 2: Correlation matrix.** N=93 tumors (cases without *MGMT* data were excluded, as well as hypermutated tumor #2 since it came from the same patient as tumor #1, see **Figure 2** and **Supplementary Table 1**). Each value represents Spearman  $\rho$  (rho) correlation coefficients, with 1=perfect direct correlation, 0=no correlation, and -1=perfect inverse correlation. \* $P$ <0.05. TMZ=temozolomide.
